# Supplementary material for: An immobilized molybdenum acetylacetonate complex on expanded starch for the epoxidation of stillingia oil
Source: Royal Society of Chemistry journal article supplement (doi:10.1039/c5ra14581c), 2015-01-01
Supplement: c5ra14581c1.pdf [file c5ra14581c1.pdf]

**Supplementary Information**

**Immobilized molybdenum acetylacetonate complex on  
expanded starch for epoxidation of stillingia oil**

Mei Hong, Mengyue Yao, Hui Pan\*

---

**S1:**  $^1\text{H}$  NMR spectra of (a) stillingia oil, (b) representative epoxidized stillingia oil.

**S2:** Assignment of  $^1\text{H}$  NMR peaks of stillingia oil and epoxidized stillingia oil.

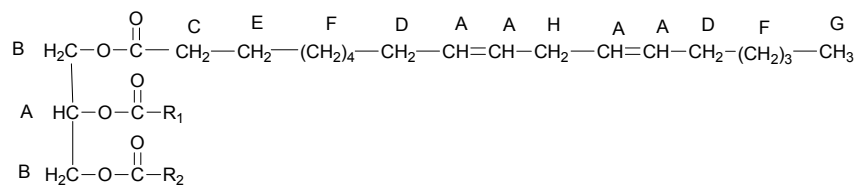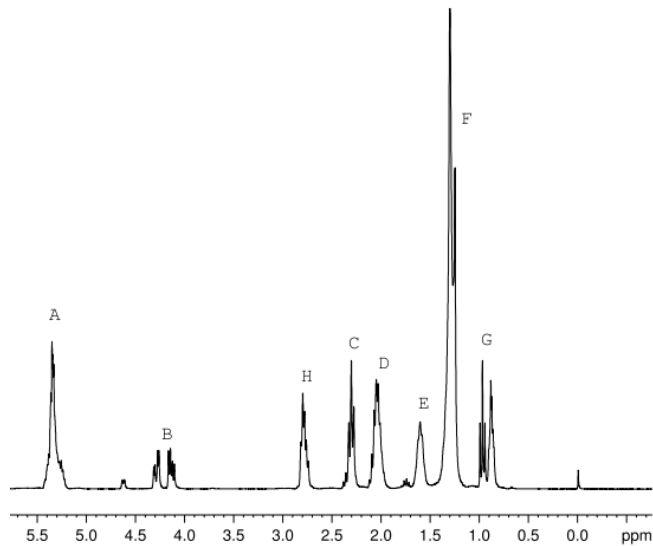

(a)

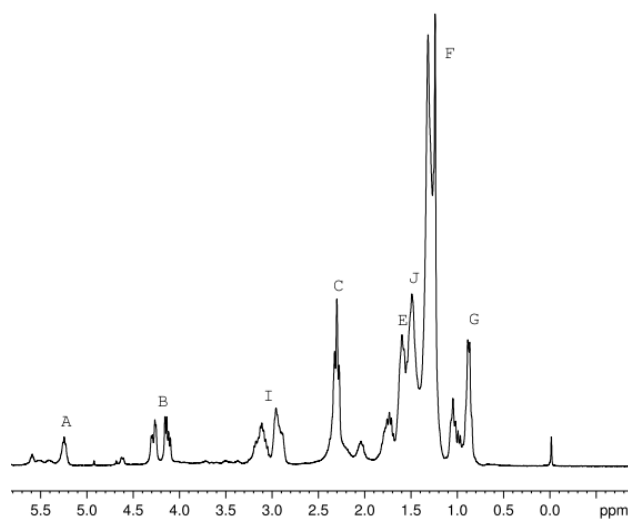

(b)

**S1:  $^1\text{H}$  NMR spectra of (a) stillingia oil, (b) representative epoxidized stillingia oil.**

**S2: Assignment of <sup>1</sup>H NMR peaks of stillingia oil and epoxidized stillingia oil.**

| Proton(s)                               | Functional group                       | Compound / chemical shift , δ (ppm ) |                           |   |
|-----------------------------------------|----------------------------------------|--------------------------------------|---------------------------|---|
|                                         |                                        | Stillingia oil                       | Epoxidized stillingia oil |   |
| CH <sub>3</sub> -C                      | Terminal methyl group                  | 0.88-1.0                             | 0.87-1.0                  | G |
| -(CH <sub>2</sub> ) <sub>n</sub> -      | Backbone CH <sub>2</sub>               | 1.25-1.30                            | 1.24-1.31                 | F |
| -CH <sub>2</sub> -CHOCH-CH <sub>2</sub> | α-Methylene group to epoxides          | -                                    | 1.49                      | J |
| -CH <sub>2</sub> CH <sub>2</sub> COOR   | β-Methylene proton                     | 1.60                                 | 1.60                      | E |
| =CH-CH <sub>2</sub> -                   | α-Methylene group to one double bond   | 2.01-2.12                            | -                         | D |
| -CH <sub>2</sub> COOR                   | α-Methylene group to ester             | 2.27-2.36                            | 2.27-2.32                 | C |
| =CH-CH <sub>2</sub> -CH=                | α-Methylene group to two double bond   | 2.74-2.81                            | -                         | H |
| -CHOCH-                                 | Epoxides proton                        | -                                    | 2.9-3.1                   | I |
| -CH <sub>2</sub> OCOR                   | Methylene group (C1 & C3) of glyceride | 4.10-4.31                            | 4.10-4.30                 | B |
| -CHOCOR                                 | Methine proton at C2 of glyceride      | 5.26-5.38                            | 5.25                      | A |
| -CH=CH-                                 | Olefinic protons                       |                                      |                           |   |
